# Supplementary material
Source: PubMed Central journal article supplement (PMC5648723)
Supplement: JCM.00915-17_zjm999095617s1.pdf [file JCM.00915-17_zjm999095617s1.pdf]

Supplemental Table 1. Antibiotic susceptibility of patient *E. cloacae* isolates

|                               | Patient1_09.<br>2014 | Patient2_10.<br>2014 |
|-------------------------------|----------------------|----------------------|
| Amikacin                      | S (KB)               | S (KB)               |
| Amoxicillin/Clavulanic Acid   | R (KB)               | >16/8 R              |
| Ampicillin                    | >16 R                | >16 R                |
| Aztreonam                     | >16R                 | >8 R                 |
| Cefazolin                     | >16 R                | >4 R                 |
| Cefepime                      | R (KB)               | R (KB)               |
| Cefotaxime                    | R (KB)               | 64 R                 |
| Cefoxitin                     | R (KB)               | >16 R                |
| Ceftazidime                   | >16 R                | 32 R                 |
| Ceftriaxone                   | 32 R                 | >32 R                |
| Chloramphenicol               | >16 R                | >16 R                |
| Ciprofloxacin                 | 2 I                  | >2 R                 |
| Colistin (custom)             | <=2                  | <=2 NI               |
| Doripenem                     | R (KB)               | R (KB)               |
| Ertapenem                     | 4 R                  | >4 R                 |
| Gentamicin                    | 8 I                  | <=4 S                |
| Imipenem                      | 2 I                  | >4 R                 |
| Levofloxacin                  | 4 I                  | >4 R                 |
| Meropenem                     | 2 I                  | >8 R                 |
| Piperacillin                  | >64 R                | >64 R                |
| Piperacillin/Tazobactam       | >64/4 R              | >64/4 R              |
| Tigecycline                   | 4 I                  | S (KB)               |
| Tobramycin                    | 8 I                  | <=4 S                |
| Trimethoprim/Sulfamethoxazole | <=2/38 S             | >2/38 R              |

KB = Kirby Bauer Interpretation
